# Supplementary material for: Structural and thermodynamic basis of interaction of the putative anticancer agent chelerythrine with single, double and triple-stranded RNAs
Source: Royal Society of Chemistry journal article supplement (doi:10.1039/c5ra00660k), 2015-01-01
Supplement: c5ra00660k1.pdf [file c5ra00660k1.pdf]

## Supplementary data

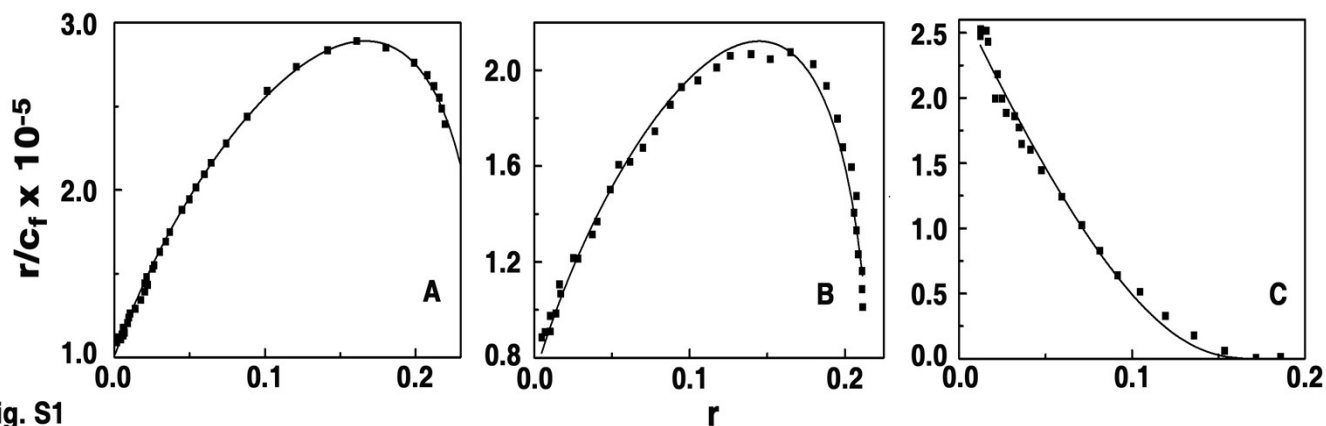

Fig. S1

Fig. S1. Scatchard isotherms of the binding fitted to cooperative and non cooperative McGhee-Hippel analysis for binding of CHL with (A) poly(UAU), (B) poly(AU) and (C) poly(U) obtained from the absorbance titration.

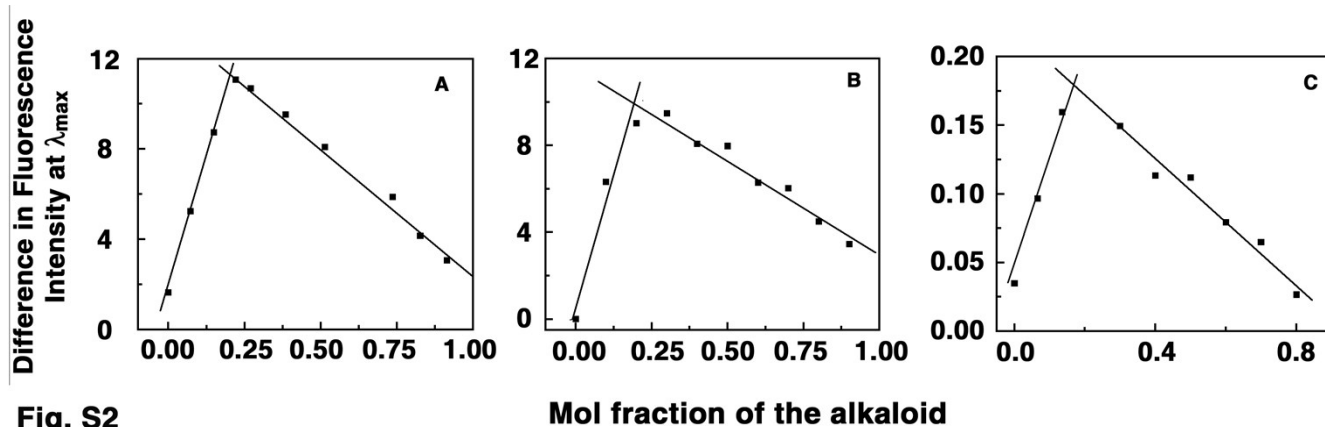

Fig. S2

Fig. S2. Job's plot for CHL binding to (A) poly(UAU), (B) poly(AU) and (C) poly(U) in 35 mM CP buffer at pH 6.3.
